# Supplementary material for: Abrocitinib: First Approval
Source: PubMed Central journal article supplement — Drugs. 2021 Nov 22;81(18):2149–57. doi: 10.1007/s40265-021-01638-3 (PMC8917037; doi:10.1007/s40265-021-01638-3), 2021-11-22
Supplement: 40265_2021_1638_MOESM1_ESM.pdf [file 40265_2021_1638_MOESM1_ESM.pdf]

## Abrocitinib: Adis Evaluation

### Key Points

- Oral, small-molecule inhibitor of JAK1 being developed by Pfizer for the treatment of moderate-to-severe AD
- Received its first approval on 9 September 2021 in the UK
- Approved for the treatment of moderate-to-severe AD in adults and adolescents 12 years and older who are candidates for systemic therapy

### Summary

Abrocitinib (Cibinqo®) is an oral small-molecule inhibitor of Janus kinase 1 (JAK1) being developed by Pfizer for the treatment of moderate-to-severe atopic dermatitis (AD).

In September 2021, abrocitinib was approved in the UK and Japan for the treatment of moderate-to-severe AD in adults and adolescents 12 years and older who are candidates for systemic therapy. Abrocitinib has also received a positive CHMP opinion in the EU for the treatment of moderate-to-severe atopic dermatitis in adults who are candidates for systemic therapy. Regulatory applications for the drug have also been submitted for review to several other countries, including the USA and Australia.

This summary represents the opinions of the [author/authors]. For a full list of declarations, including funding and author disclosure statements, please see the full text online. © Springer Nature Switzerland AG 2021.
